# 1 Co-evolution of Eukaryotic-like Vps4 and ESCRT-III Subunits in the

## 2 Asgard Archaea

3

4 Zhongyi Lu<sup>a,b</sup>, Ting Fu<sup>c,h</sup>, Tianyi Li<sup>d,e</sup>, Yang Liu<sup>a</sup>, Siyu Zhang<sup>a,f</sup>, Jinquan Li<sup>a</sup>,  
5 Junbiao Dai<sup>d,e</sup>, Eugene V Koonin<sup>g</sup>, Guohui Li<sup>c</sup>, Huiying Chu<sup>c#</sup>, Meng Li<sup>a#</sup>.

6

7 <sup>a</sup>Shenzhen Key Laboratory of Marine Microbiome Engineering, Institute for  
8 Advanced Study, Shenzhen University, Shenzhen 518060, China

9 <sup>b</sup>Key Laboratory of Optoelectronic Devices and Systems of Ministry of Edu  
10 cation and Guangdong Province, College of Optoelectronic Engineering, Sh  
11 enzheng University, Shenzhen 518060, China

12 <sup>c</sup>Laboratory of Molecular Modeling and Design, State Key Laboratory of M  
13 olecular Reaction Dynamics, Dalian Institute of Chemical Physics, Chinese  
14 Academy of Sciences, Dalian 116023, China

15 <sup>d</sup>Guangdong Provincial Key Laboratory of Synthetic Genomics, CAS Key L  
16 aboratory of Quantitative Engineering Biology and Shenzhen Key Laborator  
17 y of Synthetic Genomics, Shenzhen Institute of Synthetic Biology, Shenzhen  
18 Institutes of Advanced Technology, Chinese Academy of Sciences,  
19 Shenzhen 518055, China

20 <sup>e</sup>Key Laboratory of Industrial Biocatalysis (Ministry of Education) and Cent

er for Synthetic and Systems Biology, School of Life Sciences, Tsinghua University, Beijing 100084, China

<sup>f</sup>College of Life Sciences and Oceanography, Shenzhen University, Shenzhen 518060, China

<sup>g</sup>National Center for Biotechnology Information, National Library of Medicine, Bethesda, MD 20894, USA

<sup>h</sup>Pharmacy Department of Affiliated Zhongshan Hospital of Dalian University, Dalian 116001, China

Running Head: Vps4 and ESCRT-III in Asgard archaea

<sup>#</sup>Address correspondence to Meng Li, [limeng848@szu.edu.cn](mailto:limeng848@szu.edu.cn) and Huiying Chu, [chuhy2009@dicp.ac.cn](mailto:chuhy2009@dicp.ac.cn).

Zhongyi Lu and Ting Fu contributed equally to this work. Author order was determined in order of increasing seniority.

## 36 **ABSTRACT** (246 words)

37 The emergence of the endomembrane system is a key step in the evolution  
 38 of cellular complexity during eukaryogenesis. The Endosomal Sorting  
 39 Complex Required for Transport (ESCRT) machinery is essential and  
 40 required for the endomembrane system functions in eukaryotic cells.  
 41 Recently, genes encoding eukaryote-like ESCRT protein components have  
 42 been identified in the genomes of Asgard archaea, a newly proposed  
 43 archaeal superphylum that is thought to include the closest extant  
 44 prokaryotic relatives of eukaryotes. However, structural and functional  
 45 features of Asgard ESCRT remain uncharacterized. Here we show that Vps4,  
 46 Vps2/24/46, and Vps20/32/60, the core functional components of the Asgard  
 47 ESCRT, co-evolved eukaryote-like structural and functional features.  
 48 Phylogenetic analysis shows that Asgard Vps4, Vps2/24/46, and  
 49 Vps20/32/60 are closely related to their eukaryotic counterparts. Molecular  
 50 dynamic simulation and biochemical assays indicate that Asgard Vps4  
 51 contains a eukaryote-like Microtubule Interacting and Transport (MIT)  
 52 domain that binds the distinct type-1 MIT Interacting Motif and type-2 MIT  
 53 Interacting Motif in Vps2/24/46, and Vps20/32/60, respectively. The Asgard  
 54 Vps4 partly, but much more efficiently than homologs from other archaea,  
 55 complements the *vps4* null mutant of *Saccharomyces cerevisiae*, further

supporting the functional similarity between the membrane remodeling machineries of Asgard archaea and eukaryotes. Thus, this work provides evidence that the ESCRT complexes from Asgard archaea and eukaryotes are evolutionarily related and functionally similar. Thus, despite the apparent absence of endomembranes in Asgard archaea, the eukaryotic ESCRT seems to have been directly inherited from an Asgard ancestor, to become a key component of the emerging endomembrane system.

#### **IMPORTANCE** (105 words)

The discovery of Asgard archaea has changed the exiting ideas on the origins of Eukaryotes. Researchers propose that eukaryotic cells evolve from Asgard archaea. This hypothesis partly stems from the presence of multiple eukaryotic signature proteins in Asgard archaea, including homologues of ESCRT proteins that are essential components of the endomembrane system in eukaryotes. However, structural and functional features of Asgard ESCRT remain unknown. Our study provides evidence that Asgard ESCRT is functionally comparable to the eukaryotic counterparts suggesting that, despite the apparent absence of endomembranes in archaea, eukaryotic ESCRT was inherited from an Asgard archaeal ancestor, alongside the emergence of endomembrane system during eukaryogenesis.

76 **Keywords:** Endomembrane system, Asgard archaea, ESCRT,  
77 Eukaryogenesis, Evolution.

78

## INTRODUCTION (4595 words)

Eukaryogenesis is a major, long-standing puzzle in evolutionary biology because the specifics of the evolutionary process leading to the eukaryotic cellular complexity are far from being clear. One of the key distinctions of eukaryotic cells from the cells of prokaryotes is the presence in the former of the sophisticated endomembrane system. Undoubtedly, the emergence of the endomembrane system was a milestone event in eukaryogenesis because it is a pre-requisite of the intracellular compartmentalization which is a hallmark of eukaryotic cells (1). The Endosomal Sorting Complex Required for Transport (ESCRT) machinery is an essential component of the eukaryotic endomembrane system that, as such, has been thought to be restricted to eukaryotic cells (2). For instance, *Saccharomyces cerevisiae* ESCRT consists of five main subcomplexes: ESCRT-0, -I, -II, -III, and Vps4 (3-5). Of these, the Vps4 and ESCRT-III subunits are central players in ESCRT function that mediates remodelling and scission of endomembranes (6, 7). The ESCRT-III subunits can be further divided into two classes, termed Vps2/24/46 and Vps20/32/60, and both participate in either directly or indirectly forming membrane-bound polymeric assemblies that sever membrane necks (8). On the other hand, Vps4, an ATPase, promotes ATP-dependent disassembly of the ESCRT-III

polymers, thus ensuring the ESCRT-III subunits turnover. Several studies have shown that the N-terminal Microtubule Interacting and Transport (MIT) domain of Vps4 recognizes and interacts with the type-1 MIT Interacting Motif (MIM1) that is present in the Vps2/24/46 class ESCRT-III subunits and type-2 MIT Interacting Motif (MIM2) present in the Vps20/32/60 subunits. These recognition models are essential for the biological function of ESCRT-III and Vps4 (9-11).

The cell division (Cdv) systems discovered in some archaeal orders, such as Sulfolobales and Desulfurococcales within the TACK (Thaumarchaeota, Aigarchaeota, Crenarchaeota, and Korarchaeota) superphylum include a homolog of eukaryotic Vps4 (CdvC) and several homologs of eukaryotic ESCRT-III subunits (CdvBs) (12, 13). Given these homologies and because in eukaryotes, the MIT-MIM2 interactions occurred between CdvC and CdvB (12, 14, 15), the creanarchaeal Cdv system has been proposed to be the evolutionary ancestor of eukaryotic ESCRT (16). However, this evolutionary relationship remains uncertain. One reason for the uncertainty is that CdvBs lack the well-characterized MIM1, and the absence of the MIT-MIM1 interaction is likely to reflect major functional differences between crenarchaeal Cdv and eukaryotic ESCRT (12, 17). Such differences might indicate that, although the two systems consist of

homologous subunits, the Cdv system is not the direct ancestor of eukaryotic ESCRT.

The recently discovered Asgard archaea (including Lokiarchaeota, Thorarchaeota, Heimdallarchaeota, Odinararchaeota, and Helarchaeota) have been proposed to include the closest archaeal relatives of eukaryotes. This proposition stems, partly, from the findings that the Asgard genomes encode a broad repertoire of Eukaryotic Signature Proteins (ESPs) that are far more prevalent in Asgard than they are in other archaea (18-21). Among these ESPs are highly conserved homologs of eukaryotic ESCRT-I, -II, -III, and Vps4. Notably, the presence of these proteins in Asgard archaea that was originally demonstrated on metagenomics assemblies has been confirmed by analysis of the first closed Asgard genome, ruling out the possibility of a eukaryotic contamination (12, 18, 19, 22).

Here, we explore the phylogenetic relationships among the ESCRT-III components, reconstitute and biochemically characterize the Asgard Vps4, and test its potential biological function in the heterologous *S. cerevisiae* endomembrane system. The combined phylogenetic, genetic and biochemical analyses reveal close relationships between the ESCRT-III subunits and Vps4 of Asgard archaea and eukaryotes, to the exclusion of other archaea.



139

## 140 **RESULTS**

### 141 **Eukaryotic-like ESCRT-III subunits and Vps4 in Asgard archaea**

142       Given that the ESCRT-III subunits are tightly linked to the functional  
143 complexity of ESCRT (12), we first performed a detailed sequence  
144 comparison and phylogenetic analysis of the Vps2/24/46 and Vps20/32/60  
145 as well as the Vps4 ATPase from Asgard archaea based on the available  
146 genomic data(18, 19). In the unrooted maximum-likelihood phylogenetic  
147 tree Vps2/24/46 and Vps20/32/60, the Asgard proteins form a cluster with  
148 eukaryotic homologs that is separated from the archaeal (TACK) CdvB  
149 cluster by a long branch (Fig. 1A, Fig. S1 and Table S1), supporting the  
150 notion that Asgard archaea possess "eukaryote-like" ESCRT-III subunits.  
151 All the Asgard Vps20/32/60 proteins form a strongly supported clade with  
152 the eukaryotic Vps20/32/60 which is compatible with a direct ancestral  
153 relationship. The Asgard Vps2/24/46 proteins formed three clades one of  
154 which (Odinarchaeota, Lokiarchaeota, and Thorarchaeota) clustered with the  
155 eukaryotic homologs whereas the remaining two (Heimdallarchaeota) placed  
156 near the root of the Asgard-eukaryote branch (Fig. 1A). This tree topology is  
157 likely to result from acceleration of evolution in Heimdallarchaeota.

158       In addition to the phylogenetic results, we found that the Asgard

Vps2/24/46 contained leucine-rich motifs located in the C-terminal helix and resembling the C-terminal MIM1 that are conserved in eukaryotes although some leucine residues were substituted by isoleucine in the Asgard homologs (Fig. 1B) (9). The C-terminal regions of the Asgard Vps20/32/60 contain proline-rich motifs that resemble MIM2 although do not fully conform to the MIM2 consensus in eukaryotes and TACK archaea (10, 11). Taken together, the results of phylogenetic analysis and motif search for ESCRT-III subunits not only demonstrate the Asgard-eukaryote affinity but also show that the ancestors of the Vps2/24/46 and Vps20/32/60 groups have already diverged in Asgard archaea, antedating eukaryogenesis.

It appears likely that Vps4 structurally and functionally co-evolved with ESCRT-III subunits in Asgard archaea. To explore the evolution of Vps4, an unrooted maximum-likelihood phylogenetic tree was constructed for the group of ATPases including CdvC from the TACK superphylum, Asgard Vps4, and the so called eukaryotic "meiotic clade" comprised of Vps4, Katanin 60, and Spastin (23). As in the ESCRT-III subunit tree, the Asgard Vps4 formed a branch with the eukaryotic homolog that was separated by a long, strongly supported branch from the archaeal CdvC branch (Fig. 2A and Fig. S2). The Asgard Vps4 did not form a single clade, but rather four clades, all of which were located close to the root of the Asgard-eukaryote

branch.

Despite their high divergence demonstrated by the lack of monophyly in the phylogenetic tree (Fig. 2A and Fig. S2), all Asgard Vps4 contain the eukaryotic-like "arginine collar" that consists of three conserved arginine residues (Fig. S3A). In eukaryotes, this motif is located in the pore loop 2 of Vps4 and is involved in the ESCRT-III filaments translocation to the central pore of the Vps4 hexamer for disassembly (Fig. S3B) (24, 25).

Because Vps4 recognizes ESCRT-III subunits via the MIT domain, we specifically analyzed the phylogeny of the MIT domains of the Vps4 proteins from Asgard archaea, eukaryotes, and TACK archaea. The tree demonstrates a clear affiliation of Asgard with eukaryotes that, in this case, form a clade with one of the MIT domain from Heimdallarchaeota (Fig. 2B and Fig. S4). Affiliation with Heimdallarchaeota has been previously observed for many Asgard genes(19, 26, 27).

To further structurally characterize MIT domain in Asgard Vps4, we constructed stable models of full length Vps4 from Heimdallarchaeota\_LC\_3, Odinararchaeota\_LCB\_4, Thorarchaeota\_AB\_25, and Lokiarchaeum\_GC14\_75 using homology modeling and molecular dynamics simulation, and compared these with the *S. cerevisiae* Vps4 structure. As a control for the Asgard Vps4, we include CdvC from

*Sulfolobus solfataricus*\_P2 (cluster I in Fig. 2A) and Bathyarchaeota (cluster II in Fig. 2A). All MIT domains of Asgard Vps4 and TACK CdvC adopted a three-helix bundle structure that is closely similar to the *S. cerevisiae* MIT domain structure although the helices in both the Asgard and TACK structures are somewhat shorter than in the *S. cerevisiae* structure (Fig. 2Bb and Fig. S5).

Taken together, the above data suggest that the evolution of Asgard Vps4, especially their MIT domain, was accompanied by the functional divergence of the ESCRT-III subunits. Thus, although the Asgard Vps4 proteins are highly diverged, the results of sequence comparison, phylogenetic analysis and structural modeling are compatible with coevolution of Vps4 with ESCRT-III subunits and an ancestral relationship between the membrane remodeling machineries of Asgard and eukaryotes. Furthermore, it can be predicted that Asgard Vps2/24/46 and Vps20/32/60 form ESCRT-III-like filaments similar to those in eukaryotes.

## **Interactions between Asgard Vps4 and ESCRT-III subunits**

As previously described, unlike the CdvBs, Asgard Vps2/24/46 and Vps20/32/60 share the same eukaryotic ESCRT-III secondary structure, and these organizations are probably responsible for their ability bind to Vps4

like their eukaryotic counterparts(12). The isothermal titration calorimetry (ITC) was adopted to verify that the MIT domain of Asgard Vps4 bind to Vps2/24/46 and Vps20/32/60, respectively (Fig. S6). To characterize the interactions between Asgard Vps4 and ESCRT-III subunits, the respective binding free energies were estimated by MM-GBSA calculations (Table S2A) (28, 29). The binding free energies of Vps4-Vps2/24/46 in Heimdall\_LC\_3, Odin\_LCB\_4, Thor\_AB\_25, and Loki\_GC14\_75 were calculated as -39.02, -61.85, -71.81, -72.24 kcal/mol, respectively. All these values, although compatible with stable binding, are lower than the binding free energy of Vps4-Vps2 (-82.98 kcal/mol) in *S. cerevisiae*, suggesting that the affinity of Asgard Vps4 for Vps2/24/46 is weaker than that of *S. cerevisiae* Vps4 for Vps2. The binding free energies for Asgard Vps4-Vps20/32/60 differed to a greater degree indicating variation in the affinities (Table S2B). The Thor\_AB\_25 value of -119.97 kcal/mol was substantially greater than the binding free energy of the Vps4-Vps20 interaction in *S. cerevisiae* (-88.30 kcal/mol), the values for Heimdall\_LC\_3 (-81.43 kcal/mol) and Loki\_GC14\_75 (-88.89 kcal/mol) comparable to those for *S. cerevisiae*, and that for Odin\_LCB\_4 (-49.53 kcal/mol) much lower than in *S. cerevisiae*.

We further analyzed the structural basis for the MIT domain of Asgard

Vps4 binding to the putative MIM1 and MIM2 of Vps2/24/46 and Vps20/32/60, respectively, by using MM-GBSA calculations(28). The key amino acids that contribute to the Vps4 MIT domain binding to the Vps2/24/46 MIM1 in Heimdall\_LC\_3, Odin\_LCB\_4, and Thor\_AB\_25 are mainly located in Helix 2 and Helix 3 of the MIT domain similar to the location of MIM1-interacting residues in *S. cerevisiae* Vps4 (Fig. 3A and Table S3). These findings are consistent the MIM1 peptide binding at the interface between Helix 2 and Helix 3 of the MIT domain as observed in eukaryotes (10, 30). In Loki\_GC14\_75, the key amino acid residues are located in Helix 1 and Helix 2, suggesting a distinct interaction mode.

The key residues involved in the MIT-Vps20/32/60 interactions are spread among Helix 1, Helix 2, and Helix 3, in positions closely similar to those involved in the MIT-Vps20 interactions in *S. cerevisiae* (Fig. 3B and Table S4). Thus, the MIM2 peptide is predicted to bind the grooves formed by the three-helix bundle rather than Helix 1 and Helix 3 only as also observed for the eukaryotic ESCRT-III (10, 11). Taken together, these findings indicate that the interactions of the Asgard Vps4 MIT domain with the MIM1 (in Vps2/24/46) and MIM2 (in Vps20/32/60) motifs closely resemble the corresponding interactions in eukaryotes.

## **Asgard Vps4 phenotypically complements *vps4* null mutation in *S. cerevisiae***

We further sought to determine whether the Asgard and eukaryotic Vps4 ATPases were functionally interchangeable. To this end, Heimdall\_LC\_3, Odin\_LCB\_4, Thor\_AB\_25 and Loki\_GC14\_75 were tested for the ability to complement the *S. cerevisiae vps4* null mutation. As a control for the Asgard Vps4, we performed the complementation assays with CdvC from *S. solfataricus\_P2* and Bathyarchaeota. Briefly, we re-codon-optimized the coding sequences of Asgard Vps4 and TACK CdvC for expression in *S. cerevisiae*, and, respectively, assembled the coding sequences into transcription units of pPOT-RFP vector that contains a native promoter region of *S. cerevisiae* BY4741 *vps4* (a 500 bp DNA sequence region upstream from the ATG start codon of this gene) and a *S. cerevisiae* Cytochrome c isoform 1 (CYC1) terminator using the YeastFab Assembly method.(31) The assembly products were transformed into *S. cerevisiae vps4Δ* by the LiAc/PEG method(32). As previously described, in *S. cerevisiae*, *vps4* null mutation resulted in temperature-sensitive growth defect, causing growth arrest at 39 °C (33, 34). We found that the Asgard Vps4 could slightly suppress the growth defect of *vps4Δ* at 39 °C (Fig. 4A). Remarkably, however, after incubation at 39 °C for 96 h, the growth of

*vps4Δ* bearing Asgard Vps4 showed substantial, although variable, restoration at 30 °C, in a sharp contrast with *vps4Δ* for which no restoration was observed (Fig. 4A). Nevertheless, both CdvCs showed only minimal growth restoration of *vps4Δ* at 39 °C and a limited enhancement of viability at 30° C; complementation with these proteins was substantially less efficient than that observed with their Asgard counterparts. Furthermore, the *S. cerevisiae* Vps4, Asgard Vps4, and CdvCs were re-codon-optimized, synthesized, and respectively, cloned into a pCold-TF vector (Takara Bio Co Ltd., Japan). After expression in *Escherichia coli* BL21, proteins were purified by Mag-Beads His-Tag Protein Purification Kit (BBI Co., Ltd, China). The biochemical experiments *in vitro* show that these purified proteins are active ATPases both at 30 °C and 39 °C (Fig. 4B). This observation eliminates the possibility that the poor complement result of CdvCs was due to the lack of ATPases activity at 39 °C, and is compatible with the involvement of the ATPase activity of Asgard Vps4 in sustaining the viability of the *S. cerevisiae vps4Δ* mutant under non-permissive conditions.

As previously described, *vps4* null mutation could induce an formation of an aberrant prevacuolar compartment adjacent to the vacuoles, known as class E compartment, due to the block of intracellular protein trafficking (3,



30, 33). To further demonstrate that Asgard Vps4 is functionally analogous to its eukaryotic counterpart, we observed the vacuoles in the *S. cerevisiae* cells bearing Asgard Vps4. As expected, the characterized class E compartment vacuolar morphology was clearly observed in the *S. cerevisiae vps4Δ* cells, and this defect was almost completely rescued by *S. cerevisiae* Vps4 (Fig. 4C). We found that the Vps4 of Heimdall\_LC\_3, Odin\_LCB\_4, Thor\_AB\_25, and Loki\_GC14\_75 also partially complemented the aberrant vacuoles in the *vps4* null mutant, with the reduction of class E compartment of about 80% of that observed with the native *S. cerevisiae* Vps4 (Fig. 4C). However, the enlarged vacuoles induced in *vps4Δ* strain were not markedly eliminated by the Asgard Vps4. Taken together, these findings show that the Asgard Vps4 are functionally more similar to the eukaryotic homologs than homologs from other archaea.

## DISCUSSION

In this work, we combined computational approaches, including sequence comparison, phylogenetic analysis and structural modeling, with genetic and biochemical experiments to investigate the evolutionary and functional relationships between the ESCRT-III machineries of Asgard archaea and eukaryotes. Phylogenetic analyses of both the ESCRT-III

subunits and Vps4 ATPase show a clear affinity between Asgard archaea and eukaryotes, to the exclusion of the other archaea. Moreover, the divergence of the two groups of ESCRT-III subunits already occurred in Asgard archaea.

The results of amino acid sequence analysis and structural modeling are best compatible with the coevolution of Vps4 with the ESCRT-III subunits. In particular, the interaction between the MIT domain of Vps4 and the MIM1- and MIM2-like of the ESCRT-III subunits appears to have evolved already in Asgard archaea.

The findings of the computational analysis are complemented by our experimental results. In particular, we show that Asgard Vps4 is capable of complementing the *S. cerevisiae* vps4 null mutant much more efficiently than homologs from Crenarchaeota and Bathyarchaeota. This enhanced functionality might be underpinned by the evolution of distinct, "eukaryote-like" structural features, such as the arginine collar that is involved in the disassembly of ESCRT-III polymers.

Taken together, all these findings are compatible with the direct origin of the eukaryotic ESCRT machinery from the Asgard ancestor. In a broader evolutionary context, the ESCRT complex likely evolved in the common ancestor of the TACK and Asgard superphyla whereas its further elaboration

occurred in the Asgard lineage. The key event apparently was the duplication of CdvB that seems to combine features of Vps2/24/46 and Vps20/32/60 (12), with subsequent functional diversification of the subunits and coevolution with Vps4.

An intriguing outstanding question is the function of the ESCRT machinery in the Asgard archaea. There is no indication that these (or any other) archaea possess intracellular membranes (22), so the ECRT-III proteins and Vps4 are likely to be involved in cell division as demonstrated for the Cdv proteins of Crenarchaeota. However, the specialization of the ESCRT-III subunits might provide for the formation of eukaryotic-like filaments that could be involved not only in the inside-out fission to produce membrane vesicles that have been observed in the MK-D1 strain, but also the outside-in fission that allows the Asgard archaea to engulf their bacterial metabolic partners. The latter capability is critical for the ‘Entangle-Engulf-Enslave model’ of eukaryogenesis (22). Further molecular and cell biological study of the Asgard membrane remodeling apparatus, even if challenging due to the recalcitrance of these organisms to growth in culture, should shed light on the origin of the eukaryotic endomembrane system, one of the key aspects of eukaryogenesis.

## MATERIALS and METHODS

### Bioinformatics analysis

All the protein sequences were obtained either by NCBI accession number or by BLAST search(35) the non-redundant protein sequences against local Nr database. The protein sequences were aligned using MUSCLE (V3.8.1551)(36), trimmed with TrimAl (V1.4)(37) before construction of phylogenetic trees using IQ-Tree (V1.6.5)(38). The indicated functional domains of proteins were analyzed by Interpro (<https://www.ebi.ac.uk/interpro/>) and NCBI's conserved domain database.

### Homology modeling and docking study

We searched the Vps4, Vps2/24/46, and Vps20/32/60 sequences belonging to *S. cerevisiae*, Lokiarchaeum\_GC14\_75, Thorarchaeota\_AB\_25, Heimdallarchaeota\_LC\_3, and Odinararchaeota\_LCB\_4 from NCBI database and CdvC sequences belonging to *Sulfolobus solfataricus*\_P2, and Bathyarchaeota (<http://www.ncbi.nlm.nih.gov>, accession number: KZV07689.1, P36108.2, NP\_013794.1; KKK42121.1, KKK42122.1, KKK44605.1; OLS30569.1, OLS30568.1, OLS30800.1; OLS27542.1, OLS27541.1, OLS27540.1; OLS18192.1, OLS18193.1, OLS18194.1, AAK41192.1, WP\_119819537.1, respectively) to build homology model. The Cryo-EM structure of Vps4 (E233Q) hexamer belonging to *S. cerevisiae*

was obtained from the Protein Data Bank (PDB code: 5XMI)(39), and the subunit B was chosen for modeling template and the missing residues (1-118) were built at the I-TASSER server (<http://zhanglab.ccmb.med.umich.edu/I-TASSER>). Sequence alignments and homology modelings of Vps4 for Lokiarchaeota, Thorarchaeota, Heimdallarchaeota, and Odinararchaeota with unknown structures were carried out on MODELLER program(40), downloaded and installed from salilab server ([https://salilab.org/modeller/download\\_installation.html](https://salilab.org/modeller/download_installation.html)). The three-dimensional structures of Vps2/24/46 and Vps20/32/60 for *S. cerevisiae* and four Asgard archaea were also built at the I-TASSER server. Among several three-dimensional models generated using homology modeling and ab initio method, the best model was selected after a series of refining and minimization and molecular dynamic simulation employing ff14SB force fields parameters by AMBER 16.0 package(41). Then the complexes of Vps2/24/46 and Vps20/32/60 against Vps4 were simulated using the ZDOCK server(42). Ten top docking poses were generated.

### **Molecular dynamic (MD) simulation**

The parallel version of AMBER 16.0 package was used to prepare the complex files and conduct MD simulations employing ff14SB force fields parameters. The ionizable residues default protonation states in AMBER

16.0 were assigned. All MD simulations were carried out by applying cubic periodic boundary conditions (PBC) and in an explicit water box of TIP3P water molecules(43) with a minimum distance of 10.0 Å between complex surface and water box boundary. The Na<sup>+</sup> or Cl<sup>-</sup> counterions were added in sufficient number to neutralize any net charges of the structures above. All of chemical bond lengths of hydrogen-heavy atoms were restrained by the SHAKE algorithm(44). A cutoff radius of 10.0 Å was set for both non-bonded electrostatic and van der Waals interactions. Long-range electrostatic forces were taken into account using Particle Mesh Ewald (PME) method(45). Langevin dynamics and Langevin piston methods were applied to keep the temperature (300 K) and the pressure (1 bar) of the system constant, respectively. The time step was set to 2.0 fs.

The solvated systems were minimized using PMEMD.CUDA module enabled NVIDIA graphics processing units (GPUs)(46, 47) in three stage, keeping the solute fixed and just minimized the positions of the water and counterions firstly with 100 kcal/(mol·Å<sup>2</sup>) restraints and then reduced to 10 kcal/(mol·Å<sup>2</sup>), and lastly for the entire system without any restraining force. Each stage was conducted with 10000 steps of steepest descent algorithm followed by 1000 steps conjugate gradient minimization to get rid of any unfavorable steric contacts for both solvent and protein molecules. Then, a

NVT simulation was conducted to slowly heat the systems temperature from 0 K to 300 K over a period of 500 ps, and density equilibrated for 2000 ps with a weak restraint applied to the whole protein at 1 atm and 300 K. Finally, all restraints were removed, and production MD simulations were carried out at constant pressure (1 atm) and temperature (300 K) in NPT ensemble. For each system, MD simulation was performed for 500 ns and repeated thrice with different random number, and a total of 1.5  $\mu$ s trajectory was analyzed by CPPTRAJ module (48).

### **Calculations of binding free energy**

The binding free energies of Vps2/24/46 and Vps20/32/60 against Vps4 were calculated by molecular mechanics-generalized Born surface area (MM-GBSA) method(28, 29). All energy components were calculated using 500 snapshots that were extracted every 200 ps during the last 100 ns of each MD simulation trajectory. The configurational entropy was not considered in the approach as it is extremely time-consuming. So the binding free energy in the solvent environment can be expressed as:

$$\Delta G_{\text{bind}} = \Delta E_{\text{ele}} + \Delta E_{\text{vdw}} + \Delta G_{\text{np}} + \Delta G_{\text{ele}}$$

The  $\Delta E_{\text{ele}}$ ,  $\Delta E_{\text{vdw}}$ ,  $\Delta G_{\text{np}}$ ,  $\Delta G_{\text{ele}}$  represented electrostatic energy in the gas phase, Van der Waals energy in the gas phase, non-polar solvation energy, and polar solvation energy, respectively. All energy terms were calculated

using MM-GBSA calculations, and the  $\Delta G_{\text{ele}}$  is estimated by GB model(29), and the  $\Delta G_{\text{np}}$  is calculated from the solvent accessible surface area (SASA) of the molecules by molsurf, with the values 0.00542 and 0.92 for SURFTEN and SURFOFF, respectively(49). The decomposition of binding free energies were calculated at residue-pair level for a further investigation of the complexes interactions using the MM-GBSA decomposition program(50, 51) implemented in AMBER 16.0.

# **Protein expression in *Escherichia coli* BL21 and purification for biochemical assays *in vitro***

The Vps4, Vps2/24/46, and Vps20/32/60 coding sequences belonging to *S. cerevisiae*, Lokiarchaeum\_GC14\_75, Thorarchaeota\_AB\_25, Heimdallarchaeota\_LC\_3, and Odinarchaeota\_LCB\_4, and CdvC coding sequences belonging to *Sulfolobus solfataricus*\_P2, and Bathyarchaeota from NCBI database (<http://www.ncbi.nlm.nih.gov>, accession number: KZV07689.1, P36108.2, NP\_013794.1; KKK42121.1, KKK42122.1, KKK44605.1; OLS30569.1, OLS30568.1, OLS30800.1; OLS27542.1, OLS27541.1, OLS27540.1; OLS18192.1, OLS18193.1, OLS18194.1, AAK41192.1, WP\_119819537.1, respectively) were codon optimized by GeneDesgin (<http://54.235.254.95/gd/>) for expression in *E. coli* BL21, synthesized (BGI Genomics Co., Ltd), and, respectively, cloned into a



459 pCold-TF vector (Takara Bio Co Ltd., Japan) that includes an N-terminal  
 460 His tag and a soluble trigger factor chaperone tag. The *E. coli* BL21 (Takara  
 461 Bio Co Ltd, Japan) beared the recombinant vectors were inoculated in LB  
 462 medium containing 100 µg/ml carbenicillin, and incubated at 37°C until the  
 463 OD<sub>600</sub> reached at 0.6-0.8, and then the isopropyl-d-1-thiogalactopyranoside  
 464 was added at the final concentration of 0.5 mM, followed by incubation at  
 465 15 °C for 18-24 h. The cells pellets were collected and resuspended in 20 ml  
 466 binding buffer (20 mM phosphate buffer (pH 7.4), 500 mM NaCl, 50 mM  
 467 imidazole, 1 mM dithiothreitol, 1 mM lysozyme, and 1 mM  
 468 phenylmethylsulfonyl fluoride), followed by ultrasonic decomposition. Next,  
 469 the target proteins were purified by Mag-Beads His-Tag Protein Purification  
 470 Kit (BBI Co., Ltd, China) with wash buffer (20 mM phosphate buffer (pH  
 471 7.4), 500 mM NaCl, 100 mM imidazole, and 0.1% NP-40) and elution buffer  
 472 (20 mM phosphate buffer (pH 7.4), 500 mM NaCl, and 500 mM imidazole).  
 473 Finally, the purified proteins were concentrated to 1-2 ml in phosphate  
 474 buffered saline (PBS, pH 7.4) by 30K Amicon Ultra-15 (Millipore Co Ltd.,  
 475 USA). Concentrations of these proteins were determined by Bradford  
 476 Protein Assay Kit (Beytotime Bio Co Ltd., China). The purified Vps4,  
 477 Vps2/24/46, and Vps20/32/60 belonging to *S. cerevisiae*,  
 478 Lokiarchaeum\_GC14\_75, Thorarchaeota\_AB\_25,

Heimdallarchaeota\_LC\_3, and Odinarchaeota\_LCB\_4 were used for Isothermal titration calorimetry assay. The purified Vps4 belonging to *S. cerevisiae*, Lokiarchaeum\_GC14\_75, Thorarchaeota\_AB\_25, Heimdallarchaeota\_LC\_3, and Odinarchaeota\_LCB\_4, and Cdv belonging to *Sulfolobus solfataricus*\_P2, and Bathyarchaeota were used for ATPase activity assay.

#### **Isothermal titration calorimetry assay**

Isothermal titration calorimetry assay (ITC) was carried out at 25°C using an ITC200 system (MicroCal, USA). The Vps4 MIT domain (3 µM in PBS buffer) was placed in cell and titrated with 19 injections of 10 µl of Vps2/24/46 or Vps20/32/60 (33 µM in PBS buffer) at 2 min intervals. The heat of ligand dilution into buffer was subtracted from the reaction heat, after removing the data of 1<sup>st</sup> injection. Data analysis was carried out using Origin 7.0 (MicroCal, USA).

#### **ATPase activity assay**

The ATPase activity was determined by a slightly modified malachite green assay(52). In short, the purified proteins (4 µM) were incubated with reaction buffer (1 mM ATP, 20 mM HEPES pH 7.4, 100 mM NaCl, 10 mM MgCl<sub>2</sub>, 1 mM DTT) in a total volume of 50 µl at the indicated temperature for 90 min, and was immediately stopped by liquid nitrogen. Then, the

reaction mixture was added with 100 µl of malachite green color buffer (14 mM ammonium molybdate, 1.3 M HCl, and 1.5 mM malachite green) and 50 µl of 21% (w/v) citric acid, followed by incubation at room temperature for 30 min. Finally, the reaction mixture that turned green was attributed to the free phosphate released by Vps4 ATP hydrolysis. Additionally, the control experiments were identical to the treatment group, except that the mixture of Vps4 and reaction buffer was immediately treated with liquid nitroge before addition of malachite green color buffer and citric acid; and these experiments were to eliminate the interference of irrelevant free phosphate. Also, the empty vector was served to prove that the ATP hydrolysis is due to Vps4.

### ***S. cerevisiae* strains and cultivation**

The *S. cerevisiae* strain BY4741 (*MATa leu2Δ0 met15Δ0 ura3Δ0 his3Δ1*) and its derivative *vps4* null mutant strain YPR173Ca (designated the *S. cerevisiae*Δ*vps4* in this study) were from *S. cerevisiae* deletion mutant library (53). *S. cerevisiae* cells were routinely cultured in YPD medium (10 g/L yeast extract, 20 g/L peptone, 20 g/L glucose) or SC-Ura medium (6.7 g/L YNB, 0.01 µmol/L Fe(NH<sub>4</sub>)<sub>2</sub>(SO<sub>4</sub>)<sub>2</sub>, 20 g/L glucose, and complete amino acids without uracil) at 30 °C unless otherwise noted. The solid media were identical to those of YPD or SC-Ura except that agar was present.

## Complementation Assay

The Vps4 coding sequences belonging to Lokiarchaeum\_GC14\_75, Thorarchaeota\_AB\_25, Heimdallarchaeota\_LC\_3, and Odinararchaeota\_LCB\_4, and CdvC coding sequences belonging to *Sulfolobus solfataricus*\_P2, and Bathyarchaeota (NCBI accession number: KKK42121.1, OLS30569.1, OLS27542.1, OLS18192.1, AAK41192.1, WP\_119819537.1, respectively) were codon optimized by *GeneDesgin* (<http://54.235.254.95/gd/>) for expression in *S. cerevisiae*, before synthesis by BGI Genomics Co., Ltd (54). To eliminate the interference of transcriptional level factor, a native promoter region of *S. cerevisiae* BY4741 *vps4* (a 500 bp DNA sequence region upstream from the ATG start codon of this gene) was used to drive the coding sequences. Then, we assembled the coding sequences, the *S. cerevisiae vps4* native promoter, and a *S. cerevisiae* CYC1 (Cytochrome c isoform 1) terminator into a pPOT-RFP vector according to a developed YeastFab Assembly protocol(31). Besides, the pPOT-RFP vector containing the entire *S. cerevisiae* BY4741 *vps4* with its native promoter and the CYC1 terminator were transformed into the *vps4* null mutant *S. cerevisiae*(32), and this reconstituted strain was designated the "+*S. cerevisiae*". In this study, both the *S. cerevisiae* and *S. cerevisiae vps4Δ* were transformed with the pPOT-RFP vector as the control.

## FM-64M staining

*S. cerevisiae* cells of each strain were cultured in SC-Ura medium at 30 °C and normalized to an OD<sub>600</sub> of 0.5-0.8. Then, the *S. cerevisiae* cells were stained with 80 µM FM-64M (AAT Bioquest Co Ltd., China) at 30 °C for 20 min, and next cultured for 120 min after washes with medium. Finally, the *S. cerevisiae* cells were examined under a N-STORM fluorescence microscope (Nikon Co Ltd., Japan).

## ACKNOWLEDGMENT

This work was supported by the National Natural Science Foundation of China (Grant Nos. 91851105, 31622002, 31970105, 31725002, 21625302, 31800615), the China Postdoctoral Science Foundation (Grant No. 2018M643153), the Basic and Applied Basic Research of Guangdong Province (Grant No. 2019A1515110089), the Shenzhen Science and Technology Program (Grant No. JCYJ20170818091727570, KQTD20180412181334790), Shenzhen Key Laboratory of Synthetic Genomics (ZDSYS201802061806209), Guangdong Provincial Key Laboratory of Synthetic Genomics (2019B030301006) and the Key Project of Department of Education of Guangdong Province (No. 2017KZDXM071). EVK is supported by the Intramural Research Program funds of the National Institutes of Health of the USA.

559

## 560 **AUTHOR' CONTRIBUTIONS**

561 Zhongyi Lu and Meng Li conceived and designed the experiments. Zhongyi  
562 Lu, Tianyi Li, Siyu Zhang, and Jinqun Li performed the experiments.  
563 Huiying Chu and Guohui Li designed the molecular dynamics strategy. Ting  
564 Fu performed the simulations. Zhongyi Lu, Ting Fu, and Huiying Chu  
565 analyzed the data. Yang Liu and Junbiao Dai contributed  
566 reagents/materials/analysis tools. Zhongyi Lu, Ting Fu, Eugene Koonin and  
567 Meng Li wrote and all authors edited and approved the paper.

568

## 569 **CONFLICT OF INTEREST**

570 The authors declare no conflict of interest.

571

## 572 **REFERENCE**

- 573 1. Dacks JB, Peden AA, Field MC. 2009. Evolution of specificity in the eukaryotic  
574 endomembrane system. *Int J Biochem Cell Biol* 41:330-40.
- 575 2. Hartman H, Fedorov A. 2002. The origin of the eukaryotic cell: a genomic  
576 investigation. *Proc Natl Acad Sci U S A* 99:1420-5.
- 577 3. Babst M, Sato TK, Banta LM, Emr SD. 1997. Endosomal transport function in  
578 yeast requires a novel AAA-type ATPase, Vps4p. *EMBO J* 16:1820-31.
- 579 4. Bowers K, Lottridge J, Helliwell SB, Goldthwaite LM, Luzio JP, Stevens TH.  
580 2004. Protein-protein interactions of ESCRT complexes in the yeast  
581 *Saccharomyces cerevisiae*. *Traffic* 5:194-210.
- 582 5. Olmos Y, Carlton JG. 2016. The ESCRT machinery: new roles at new holes. *Curr*  
583 *Opin Cell Biol* 38:1-11.
- 584 6. McCullough J, Frost A, Sundquist WI. 2018. Structures, Functions, and Dynamics  
585 of ESCRT-III/Vps4 Membrane Remodeling and Fission Complexes. *Annu Rev*

586 Cell Dev Biol doi:10.1146/annurev-cellbio-100616-060600.

587 7. Leung KF, Dacks JB, Field MC. 2008. Evolution of the multivesicular body

588 ESCRT machinery; retention across the eukaryotic lineage. *Traffic* 9:1698-716.

589 8. Wollert T, Wunder C, Lippincott-Schwartz J, Hurley JH. 2009. Membrane

590 scission by the ESCRT-III complex. *Nature* 458:172-7.

591 9. Obita T, Saksena S, Ghazi-Tabatabai S, Gill DJ, Perisic O, Emr SD, Williams RL.

592 2007. Structural basis for selective recognition of ESCRT-III by the AAA ATPase

593 Vps4. *Nature* 449:735-9.

594 10. Kieffer C, Skalicky JJ, Morita E, De Domenico I, Ward DM, Kaplan J, Sundquist

595 WI. 2008. Two distinct modes of ESCRT-III recognition are required for VPS4

596 functions in lysosomal protein targeting and HIV-1 budding. *Dev Cell* 15:62-73.

597 11. Kojima R, Obita T, Onoue K, Mizuguchi M. 2016. Structural Fine-Tuning of

598 MIT-Interacting Motif 2 (MIM2) and Allosteric Regulation of ESCRT-III by

599 Vps4 in Yeast. *J Mol Biol* 428:2392-2404.

600 12. Caspi Y, Dekker C. 2018. Dividing the Archaeal Way: The Ancient Cdv Cell-

601 Division Machinery. *Front Microbiol* 9:174.

602 13. Makarova KS, Yutin N, Bell SD, Koonin EV. 2010. Evolution of diverse cell

603 division and vesicle formation systems in Archaea. *Nat Rev Microbiol* 8:731-41.

604 14. Samson RY, Obita T, Hodgson B, Shaw MK, Chong PL, Williams RL, Bell SD.

605 2011. Molecular and structural basis of ESCRT-III recruitment to membranes

606 during archaeal cell division. *Mol Cell* 41:186-96.

607 15. Lindas AC, Karlsson EA, Lindgren MT, Ettema TJ, Bernander R. 2008. A unique

608 cell division machinery in the Archaea. *Proc Natl Acad Sci U S A* 105:18942-6.

609 16. Samson RY, Dobro MJ, Jensen GJ, Bell SD. 2017. The Structure, Function and

610 Roles of the Archaeal ESCRT Apparatus. *Subcell Biochem* 84:357-377.

611 17. Liu J, Gao R, Li C, Ni J, Yang Z, Zhang Q, Chen H, Shen Y. 2017. Functional

612 assignment of multiple ESCRT-III homologs in cell division and budding in

613 *Sulfolobus islandicus*. *Mol Microbiol* 105:540-553.

614 18. Spang A, Saw JH, Jorgensen SL, Zaremba-Niedzwiedzka K, Martijn J, Lind AE,

615 van Eijk R, Schleper C, Guy L, Ettema TJG. 2015. Complex archaea that bridge

616 the gap between prokaryotes and eukaryotes. *Nature* 521:173-179.

617 19. Zaremba-Niedzwiedzka K, Caceres EF, Saw JH, Backstrom D, Juzokaite L,

618 Vancaester E, Seitz KW, Anantharaman K, Starnawski P, Kjeldsen KU, Stott MB,

619 Nunoura T, Banfield JF, Schramm A, Baker BJ, Spang A, Ettema TJ. 2017.

620 Asgard archaea illuminate the origin of eukaryotic cellular complexity. *Nature*

621 541:353-358.

622 20. Seitz KW, Dombrowski N, Eme L, Spang A, Lombard J, Sieber JR, Teske AP,

623 Ettema TJG, Baker BJ. 2019. Asgard archaea capable of anaerobic hydrocarbon

624 cycling. *Nat Commun* 10:1822.

625 21. Liu Y, Zhou Z, Pan J, Baker BJ, Gu JD, Li M. 2018. Comparative genomic

626 inference suggests mixotrophic lifestyle for Thorarchaeota. *ISME J* 12:1021-

627 1031.

628 22. Imachi H, Nobu MK, Nakahara N, Morono Y, Ogawara M, Takaki Y, Takano Y,

629 Uematsu K, Ikuta T, Ito M, Matsui Y, Miyazaki M, Murata K, Saito Y, Sakai S,

630 Song C, Tasumi E, Yamanaka Y, Yamaguchi T, Kamagata Y, Tamaki H, Takai K.

631 2019. Isolation of an archaeon at the prokaryote-eukaryote interface. *Nature* doi:



10.1038/s41586-019-1916-6.

23. Monroe N, Hill CP. 2016. Meiotic Clade AAA ATPases: Protein Polymer Disassembly Machines. *J Mol Biol* 428:1897-911.

24. Gonciarz MD, Whitby FG, Eckert DM, Kieffer C, Heroux A, Sundquist WI, Hill CP. 2008. Biochemical and structural studies of yeast Vps4 oligomerization. *J Mol Biol* 384:878-95.

25. Yang B, Stjepanovic G, Shen Q, Martin A, Hurley JH. 2015. Vps4 disassembles an ESCRT-III filament by global unfolding and processive translocation. *Nat Struct Mol Biol* 22:492-8.

26. Da Cunha V, Gaia M, Nasir A, Forterre P. 2018. Asgard archaea do not close the debate about the universal tree of life topology. *PLoS Genet* 14:e1007215.

27. Spang A, Stairs CW, Dombrowski N, Eme L, Lombard J, Caceres EF, Greening C, Baker BJ, Ettema TJG. 2019. Proposal of the reverse flow model for the origin of the eukaryotic cell based on comparative analyses of Asgard archaeal metabolism. *Nat Microbiol* 4:1138-1148.

28. Kollman PA, Massova I, Reyes C, Kuhn B, Huo S, Chong L, Lee M, Lee T, Duan Y, Wang W, Donini O, Cieplak P, Srinivasan J, Case DA, Cheatham TE, 3rd. 2000. Calculating structures and free energies of complex molecules: combining molecular mechanics and continuum models. *Acc Chem Res* 33:889-97.

29. Bashford D, Case DA. 2000. Generalized born models of macromolecular solvation effects. *Annual Review of Physical Chemistry* 51:129-152.

30. Stuchell-Brereton MD, Skalicky JJ, Kieffer C, Karren MA, Ghaffarian S, Sundquist WI. 2007. ESCRT-III recognition by VPS4 ATPases. *Nature* 449:740-4.

31. Guo Y, Dong J, Zhou T, Auxillos J, Li T, Zhang W, Wang L, Shen Y, Luo Y, Zheng Y, Lin J, Chen GQ, Wu Q, Cai Y, Dai J. 2015. YeastFab: the design and construction of standard biological parts for metabolic engineering in *Saccharomyces cerevisiae*. *Nucleic Acids Res* 43:e88.

32. Gietz RD, Schiestl RH. 2007. Quick and easy yeast transformation using the LiAc/SS carrier DNA/PEG method. *Nat Protoc* 2:35-7.

33. Scheuring S, Rohricht RA, Schoning-Burkhardt B, Beyer A, Muller S, Abts HF, Kohrer K. 2001. Mammalian cells express two VPS4 proteins both of which are involved in intracellular protein trafficking. *J Mol Biol* 312:469-80.

34. Scheuring S, Bodor O, Rohricht RA, Muller S, Beyer A, Kohrer K. 1999. Cloning, characterisation, and functional expression of the *Mus musculus* SKD1 gene in yeast demonstrates that the mouse SKD1 and the yeast VPS4 genes are orthologues and involved in intracellular protein trafficking. *Gene* 234:149-59.

35. Mount DW. 2007. Using the basic local alignment search tool (BLAST). *Cold Spring Harbor Protocols* 2007:pdb. top17.

36. Edgar RC. 2004. MUSCLE: a multiple sequence alignment method with reduced time and space complexity. *BMC Bioinformatics* 5:113.

37. Capella-Gutierrez S, Silla-Martinez JM, Gabaldon T. 2009. trimAl: a tool for automated alignment trimming in large-scale phylogenetic analyses. *Bioinformatics* 25:1972-3.

38. Nguyen LT, Schmidt HA, von Haeseler A, Minh BQ. 2015. IQ-TREE: a fast and effective stochastic algorithm for estimating maximum-likelihood phylogenies. *Mol Biol Evol* 32:268-74.



- 678 39. Sun S, Li L, Yang F, Wang X, Fan F, Yang M, Chen C, Li X, Wang HW, Sui SF.  
679 2017. Cryo-EM structures of the ATP-bound Vps4(E233Q) hexamer and its  
680 complex with Vta1 at near-atomic resolution. *Nat Commun* 8:16064.
- 681 40. Sanchez R, Sali A. 2000. Comparative protein structure modeling. Introduction  
682 and practical examples with modeller. *Methods Mol Biol* 143:97-129.
- 683 41. D.A. Case RMB, D.S. Cerutti, T.E. Cheatham, III, T.A. Darden, R.E. Duke, T.J.  
684 Giese, H. Gohlke,, A.W. Goetz NH, S. Izadi, P. Janowski, J. Kaus, A. Kovalenko,  
685 T.S. Lee, S. LeGrand, P. Li, C., Lin TL, R. Luo, B. Madej, D. Mermelstein, K.M.  
686 Merz, G. Monard, H. Nguyen, H.T. Nguyen, I., Omelyan AO, D.R. Roe, A.  
687 Roitberg, C. Sagui, C.L. Simmerling, W.M. Botello-Smith, J. Swails,, R.C.  
688 Walker JW, R.M. Wolf, X. Wu, L. Xiao and P.A. Kollman. 2016. AMBER 2016,  
689 University of California, San Francisco.
- 690 42. Pierce BG, Wiehe K, Hwang H, Kim BH, Vreven T, Weng Z. 2014. ZDOCK  
691 server: interactive docking prediction of protein-protein complexes and symmetric  
692 multimers. *Bioinformatics* 30:1771-3.
- 693 43. Jorgensen WL, Chandrasekhar J, Madura JD, Impey RW, Klein ML. 1983.  
694 Comparison of Simple Potential Functions for Simulating Liquid Water. *Journal*  
695 *of Chemical Physics* 79:926-935.
- 696 44. Ryckaert JP, Ciccotti G, Berendsen HJC. 1977. Numerical-Integration of  
697 Cartesian Equations of Motion of a System with Constraints - Molecular-  
698 Dynamics of N-Alkanes. *Journal of Computational Physics* 23:327-341.
- 699 45. Essmann U, Perera L, Berkowitz ML, Darden T, Lee H, Pedersen LG. 1995. A  
700 Smooth Particle Mesh Ewald Method. *Journal of Chemical Physics* 103:8577-  
701 8593.
- 702 46. Gotz AW, Williamson MJ, Xu D, Poole D, Le Grand S, Walker RC. 2012. Routine  
703 Microsecond Molecular Dynamics Simulations with AMBER on GPUs. 1.  
704 Generalized Born. *J Chem Theory Comput* 8:1542-1555.
- 705 47. Salomon-Ferrer R, Gotz AW, Poole D, Le Grand S, Walker RC. 2013. Routine  
706 Microsecond Molecular Dynamics Simulations with AMBER on GPUs. 2.  
707 Explicit Solvent Particle Mesh Ewald. *J Chem Theory Comput* 9:3878-88.
- 708 48. Roe DR, Cheatham TE, 3rd. 2013. PTRAJ and CPPTRAJ: Software for  
709 Processing and Analysis of Molecular Dynamics Trajectory Data. *J Chem Theory*  
710 *Comput* 9:3084-95.
- 711 49. Weiser J, Shenkin PS, Still WC. 1999. Approximate atomic surfaces from linear  
712 combinations of pairwise overlaps (LCPO). *Journal of Computational Chemistry*  
713 20:217-230.
- 714 50. Tsui V, Case DA. 2001. Theory and applications of the generalized Born solvation  
715 model in macromolecular Simulations. *Biopolymers* 56:275-291.
- 716 51. Wang W, Donini O, Reyes CM, Kollman PA. 2001. Biomolecular simulations:  
717 Recent developments in force fields, simulations of enzyme catalysis, protein-  
718 ligand, protein-protein, and protein-nucleic acid noncovalent interactions. *Annual*  
719 *Review of Biophysics and Biomolecular Structure* 30:211-243.
- 720 52. Merrill SA, Hanson PI. 2010. Activation of human VPS4A by ESCRT-III proteins  
721 reveals ability of substrates to relieve enzyme autoinhibition. *J Biol Chem*  
722 285:35428-38.
- 723 53. Giaeffer G, Chu AM, Ni L, Connelly C, Riles L, Veronneau S, Dow S, Lucau-

- 724 Danila A, Anderson K, Andre B, Arkin AP, Astromoff A, El-Bakkoury M,  
725 Bangham R, Benito R, Brachat S, Campanaro S, Curtiss M, Davis K,  
726 Deutschbauer A, Entian KD, Flaherty P, Foury F, Garfinkel DJ, Gerstein M, Gotte  
727 D, Guldener U, Hegemann JH, Hempel S, Herman Z, Jaramillo DF, Kelly DE,  
728 Kelly SL, Kotter P, LaBonte D, Lamb DC, Lan N, Liang H, Liao H, Liu L, Luo C,  
729 Lussier M, Mao R, Menard P, Ooi SL, Revuelta JL, Roberts CJ, Rose M, Ross-  
730 Macdonald P, Scherens B, et al. 2002. Functional profiling of the *Saccharomyces*  
731 *cerevisiae* genome. *Nature* 418:387-91.
- 732 54. Richardson SM, Wheelan SJ, Yarrington RM, Boeke JD. 2006. GeneDesign:  
733 rapid, automated design of multikilobase synthetic genes. *Genome Res* 16:550-6.

## 736 Figures Legends

737 **FIG 1. Phylogenetic and amino acid sequence analysis of the ESCRT-**  
738 **III-related subunits in archaea and eukarya.** (A) Unrooted maximum-  
739 likelihood phylogenetic tree of the ESCRT-III-related subunits in archaea  
740 and eukarya. The information of the Asgard Vps2/24/46 and Vps20/32/60  
741 can be found in Table S1. Part of the bootstrap values are shown on nodes.  
742 (B) Predicted MIM1 and MIM2 in Asgard Vps2/24/46 and Vps20/32/60,  
743 respectively. The information of proteins used here can be found in Table S1.  
744 The ESCRT-III core domain, C-terminal helix, and MIM1 and MIM2 are  
745 presented.

746  
747 **FIG 2. Phylogenetic and structural analysis of the Asgard Vps4.**

748 (A) Unrooted maximum likelihood phylogenetic analysis of the Vps4-  
749 related in archaea and eukarya. The information of the Asgard Vps4 can be  
750 found in Table S1. Part of the bootstrap values are shown on nodes. (B)

Phylogenetic (a) and structural (b) analysis of the Asgard Vps4 MIT domain. The sequences of CdvC MIT domain are used as the outgroup to further confirm the phylogenetic relationship of the MIT domain in eukaryotic and Asgard Vps4. The antiparallel three-helix bundle of MIT domains is shown explicitly.

**FIG 3. Comparison of the Vps4 (surface representation, grey) in complex with ESCRT-III subunits (ribbon representation, blue) in Asgard archaea.**

The MIM1 and MIM2 are shown in orange (stick representation, orange) and highlighted in red in close-up views (space filling representation). The black letters indicated main residues in MIT domains that contribute to the interaction. The Vps4 MIT domain in complex with (A) Vps2/24/46 and (B) Vps20/32/60 subunits in *S. cerevisiae*, Heimdall\_LC\_3, Odin\_LCB\_4, Thor\_AB\_25, and Loki\_GC14\_75 are indicated.

**FIG 4. Functional complementation of *Saccharomyces cerevisiae* vps4 null mutants by Asgard Vps4.**

(A) Complementation of the high-temperature-sensitive growth defect of vps4 mutant cells. Five microliters of a series of 10-fold dilutions derived

from a starting suspension of an OD<sub>600</sub> of 10<sup>-1</sup> was inoculated into SC-Ura medium. (B) The ATPase activity of *S. cerevisiae* Vps4, Asgard Vps4 and Cdvs at 30 °C and 39 °C were, respectively, confirmed by a malachite green assay. The substrates would turn from golden to green owing to the inorganic phosphate released from ATP hydrolysis by Vps4 under the indicated condition. (C) The class E compartments in *S. cerevisiae* vps4 null mutants were largely abrogated by Asgard Vps4. The vacuolar morphologies in the indicated strains were visualized by fluorescent microscopy. Arrowhead highlights the class E compartment in vps4 null mutant. Scale bar=10 µm. Quantification of class E compartment in the indicated strains. The results represented the means from three independent replicates (20 cells per experiment), and standard deviations are indicated with error bars. Statistical significance was assessed by one-way analysis of variance with Bonferroni's multiple-comparison test. \*\*, *P*<0.01.

## Supplemental information

**FIG S1. Phylogenetic analysis of ESCRT-III-related proteins in the eukarya and archaea.** The tree was reconstructed by maximum likelihood analysis using 156 representative amino acid sequences based on LG+G4 model (recommended by the "TESTONLY"), with option "-bb 1000", and the bootstrap values are shown on nodes.

**FIG S2. Phylogenetic analysis of Vps4-related proteins in eukarya and archaea.** The tree was reconstructed by maximum likelihood analysis using 76 representative amino acid sequences based on LG+I+G4 model (recommended by the "TESTONLY"), with option "-bb 1000", and the bootstrap values are shown on nodes.

**FIG S3. Predicted "arginine collar" in Vps4 of Asgard archaea and eukarya.** (A) The Walker A, Walker B, Sensor I, ARG finger, and Sensor II are conserved across all the indicated sequences, and are shown to confirm the location of "arginine collar". Conserved arginine residues of "arginine collar" are highlighted (red shading and red letters, respectively). The information of proteins used here can be found in Table S1. (B) The top and bottom views of the hexameric ring (grey) were constructed by

Heimdall\_LC\_3 Vps4 (white) as the example to demonstrate the location of "arginine collar", including R222, R231, and R232.

**FIG S4. Phylogenetic analysis of the Microtubule Interacting and Transport domain in Vps4-related proteins.** The tree was reconstructed by maximum likelihood analysis using 48 amino acid sequences based on LG+I+G4 model (recommended by the "TESTONLY"), with option "-bb 1000", and the bootstrap values are shown on nodes.

**FIG S5. The number of Vps4 and CdvC Microtubule Interacting and Transport domain amino acid residues in alpha conformation of Asgard archaea, *Saccharomyces cerevisiae* and TACK archaea during molecular dynamic simulations.** The curves of the numbers of Vps4 MIT domain amino acid residues in alpha conformation of Asgard and *S. cerevisiae*, which were calculated from the last 200 ns MD simulation trajectories, were plotted against simulation time.

**FIG S6. ITC binding profiles of Asgard Vps4 Microtubule Interacting and Transport domain titrated with Asgard Vps2/24/46 and Vps20/32/60.** (A) The curve of Heimdall\_LC\_3 TF-Vps4-MIT titrated with

831 Heimdall\_LC\_3 TF-Vps2/24/46 was fit to Sequential Binding Sites;  $\Delta H_1 = -$   
832  $4.73 \times 10^5$  cal mol<sup>-1</sup>;  $\Delta H_2 = 9.31 \times 10^5$  cal mol<sup>-1</sup>. The curve of Heimdall\_LC\_3-  
833 Vps4-MIT titrated with Heimdall\_LC\_3 TF-Vps20/32/60 was fit to  
834 Sequential Binding Sites;  $\Delta H_1 = 2.78 \times 10^6$  cal mol<sup>-1</sup>;  $\Delta H_2 = -2.31 \times 10^6$  cal mol<sup>-1</sup>.  
835 (B) The curve of Odin\_LCB\_4 TF-Vps4-MIT titrated with Odin\_LCB\_4  
836 Vps2/24/46 was fit to One Set of Sites;  $\Delta H = 3.92 \times 10^5$  cal mol<sup>-1</sup>. The curve of  
837 Odin\_LCB\_4 TF-Vps4-MIT titrated with Odin\_LCB\_4 TF-Vps20/32/60  
838 was fit to One Set of Sites;  $\Delta H = 3.31 \times 10^5$  cal mol<sup>-1</sup>. (C) The curve of  
839 Thor\_AB\_25 TF-Vps4-MIT titrated with Thor\_AB\_25 TF-Vps2/24/46 was  
840 fit Sequential Binding Sites;  $\Delta H_1 = 3.25 \times 10^8$  cal mol<sup>-1</sup>;  $\Delta H_2 = 1.29 \times 10^6$  cal  
841 mol<sup>-1</sup>. The curve of Thor\_AB\_25 TF-Vps4-MIT titrated with Thor\_AB\_25  
842 TF-Vps20/32/60 was fit to One Set of Sites;  $\Delta H = 1.62 \times 10^6$  cal mol<sup>-1</sup>. (D)  
843 The curve of Loki\_GC14\_75 TF-Vps4-MIT titrated with Loki\_GC14\_75  
844 TF-Vps2/24/46 was fit to Sequential Binding Sites;  $\Delta H_1 = -1.21 \times 10^5$  cal mol<sup>-1</sup>;  
845  $\Delta H_2 = 4.22 \times 10^5$  cal mol<sup>-1</sup>. The curve of Loki\_GC14\_75 TF-Vps4-MIT  
846 titrated with Loki\_GC14\_75 TF-Vps20/32/60 was fit to One Set of Sites;  
847  $\Delta H = 1.42 \times 10^6$  cal mol<sup>-1</sup>. Binding to a TF control surface was negligible (not  
848 shown).

849

850 **TABLE S1. Summary of proteins used in this study.**

851

852 **TABLE S2. The predicted binding free energies between Vps4 and**  
 853 **ESCRT-III subunits (Vps2/24/46 (A), and Vps20/32/60 (B)).**

854

855 **TABLE S3. The dominant amino acid residues of Vps4 Microtubule**  
 856 **Interacting and Transport domain involved in binding with Vps2/24/46**  
 857 **are listed.**

858

859 **TABLE S4. The dominant amino acid residues of Vps4 Microtubule**  
 860 **Interacting and Transport domain involved in binding with Vps20/32/60**  
 861 **are listed.**

862



A

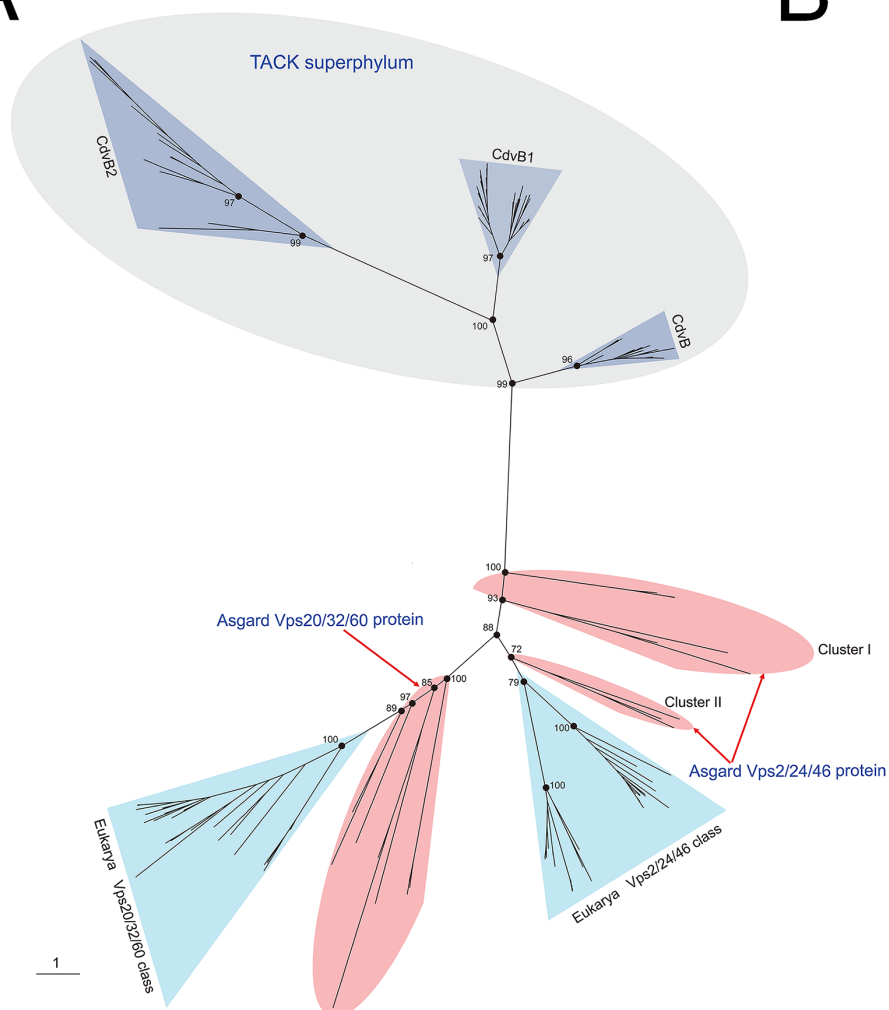

B

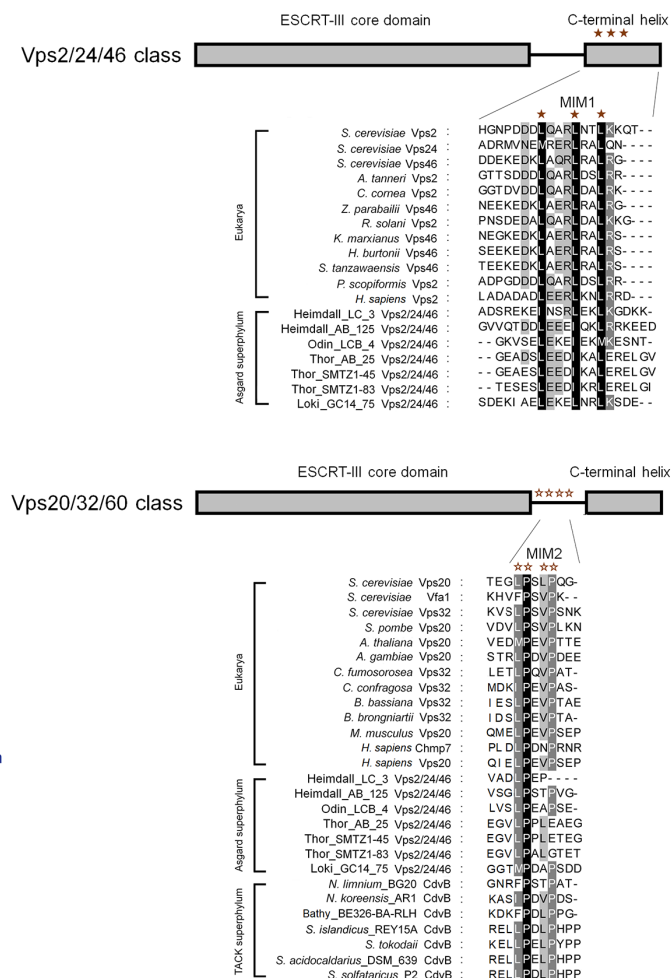

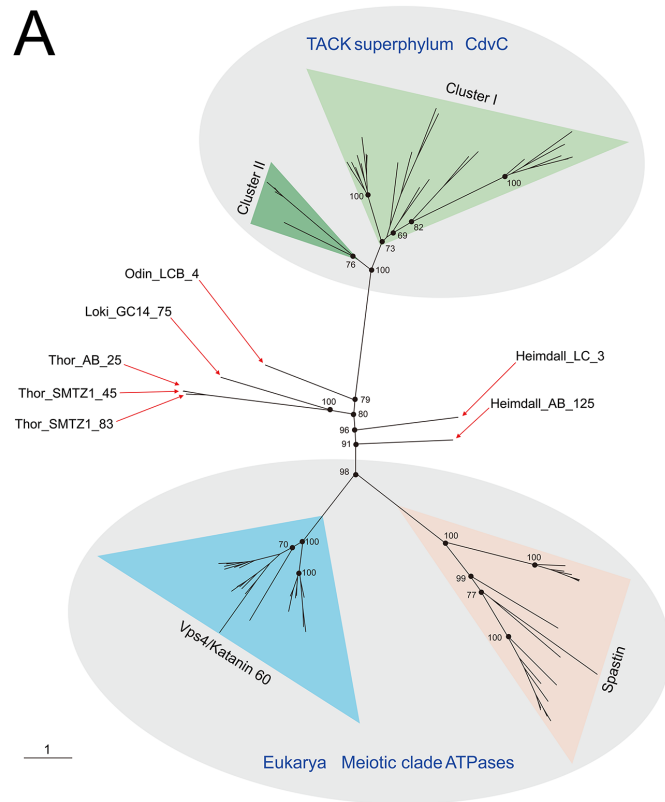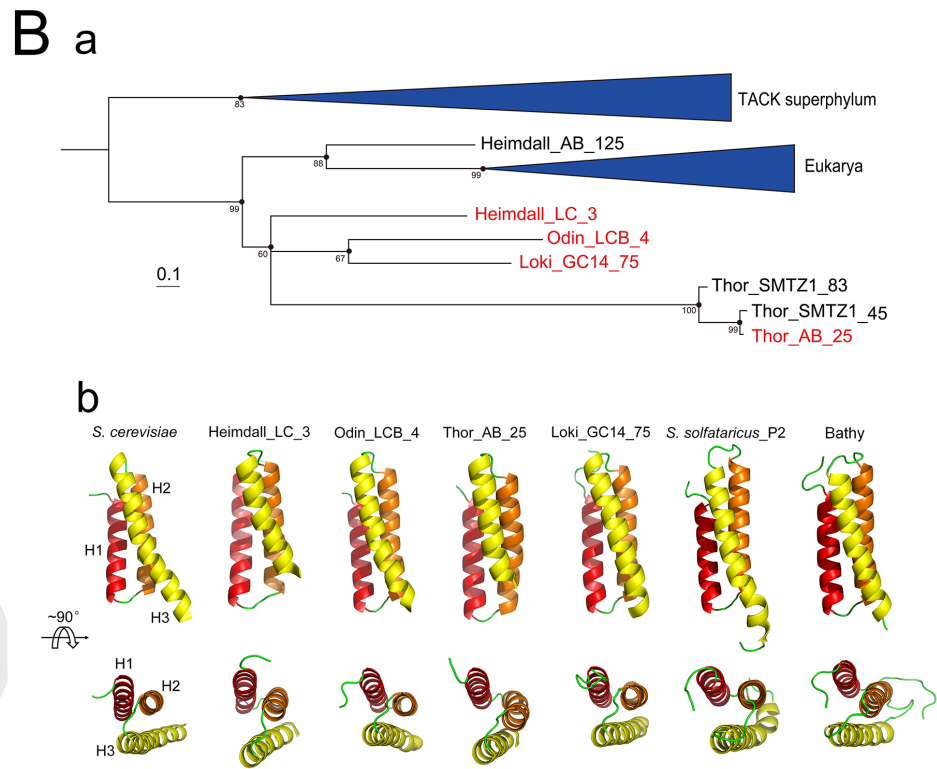

**A**

*S. cerevisiae*

Vps4 MIT vs Vps2

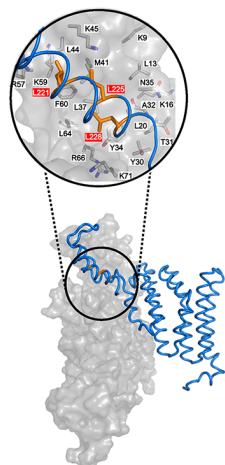

Heimdall\_LC\_3

Vps4 MIT vs Vps2/24/46

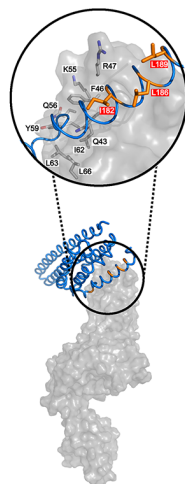

Odin\_LCB\_4

Vps4 MIT vs Vps2/24/46

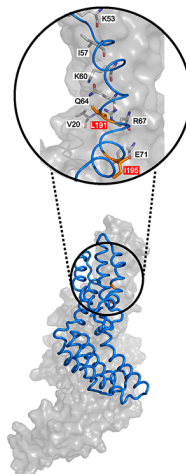

Thor\_AB\_25

Vps4 MIT vs Vps2/24/46

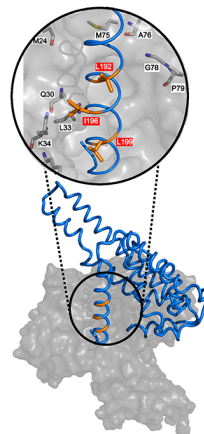

Loki\_GC14\_75

Vps4 MIT vs Vps2/24/46

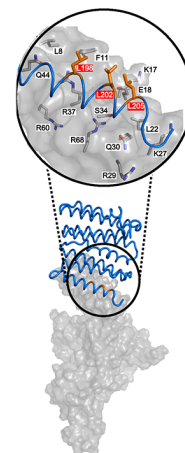

**B**

Vps4 MIT vs Vps20

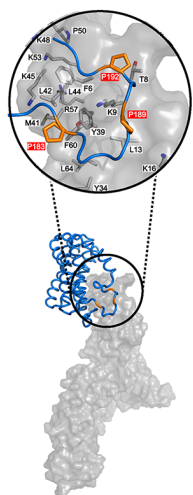

Vps4 MIT vs Vps20/32/60

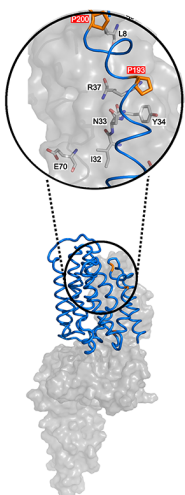

Vps4 MIT vs Vps20/32/60

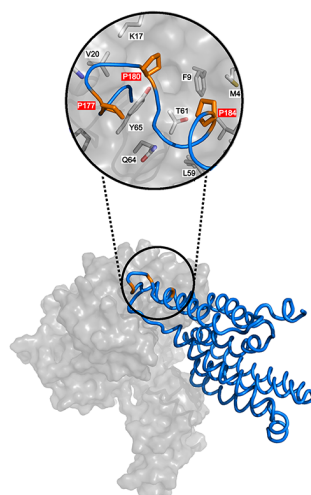

Vps4 MIT vs Vps20/32/60

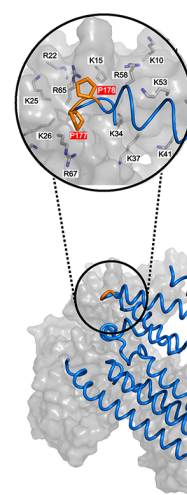

Vps4 MIT vs Vps20/32/60

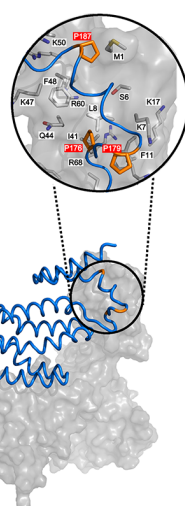

**A**

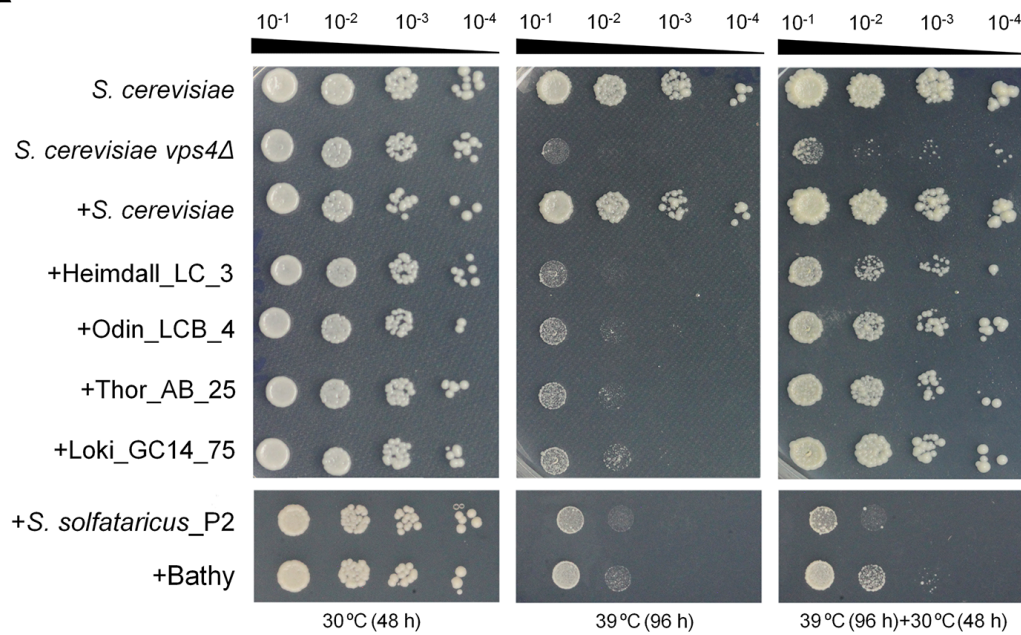

**B**

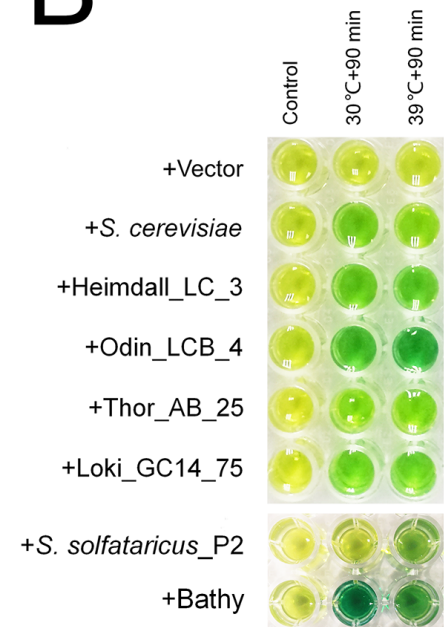

**C**

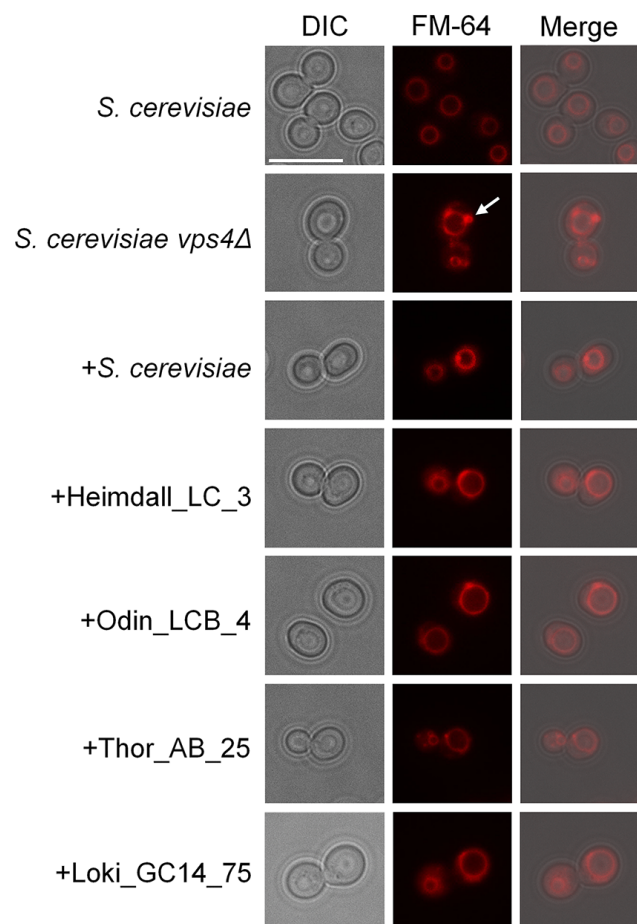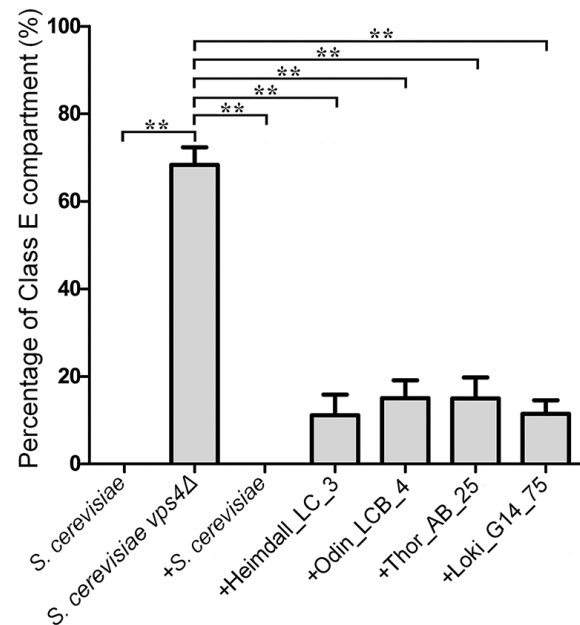

Source: https://www.biorxiv.org/content/10.1101/2020.05.05.080093v1.full.pdf
